# Supplementary material
Source: HighWire-hosted journal article supplement (http://cmajopen.ca/highwire/filestream/84941/field_highwire_adjunct_files/0/2020-0163-1-at.pdf)
Supplement: 2020-0163-1-at.pdf [file 2020-0163-1-at.pdf]

## Appendix 1: COVID Interview Guide

### Physician or NP Interview:

- What is your experience with assessing and providing MAiD? (numbers)
- How long have you been doing this?
- How many patients have you assessed?
- I would like you to tell me about patients you assessed or provided MAiD during the pandemic.
- For each case, what extra challenges were there?
- What were the impacts on patient and family?
- What mitigating factors were there for impacts?
- How could this situation be improved?

### Demographics

Age, gender, MD or NP, Canadian graduate, practice type (primary care vs specialists, full time vs part time), rural or urban

### MAiD Coordinator interview

- What is your experience coordinating MAiD patients? (numbers)
- How long have you been doing this?
- I would like you to tell me about patients that were assessed for or had MAiD during the pandemic.
- For each case, what were the extra challenges?
- What were the impacts on patient and family?
- What mitigating factors were there for impacts?
- How could this situation be improved?

### Demographics

Age, gender,

Version 200401 H15-03198-A013
